# Supplementary material
Source: publisher site journal article supplement (https://www.dovepress.com/article/243048)
Supplement: Supplementary file 1 [file get_supplementary_file.php]

Supplementary Table1. Baseline sociodemographic characteristics of the participants.

| **Characteristics** | | Medical staff  (A)  N=146(%) | Medical student  (B)  N=102(%) | Community population  (C)  N=1001(%) |
| --- | --- | --- | --- | --- |
| Occupation | |  |  |  |
|  | White-collar workers and civil servant | - | - | 297(29.7) |
|  | Professionals | - | - | 245(24.5) |
|  | Unemployed | - | - | 220(22.0) |
|  | Students | - | - | 119(11.9) |
|  | Laborers | - | - | 112(11.2) |
|  | Domestic works | - | - | 3(0.3) |
|  | Other | - | - | 5(0.5) |
| Title of professional | |  |  |  |
|  | Chief physician | 8(5.5) | 0(0.0) | - |
|  | Associate chief physician | 30(20.5) | 0(0.0) | - |
|  | Attending physician | 55(37.7) | 0(0.0) | - |
|  | Resident | 50(34.2) | 0(0.0) | - |
|  | No technical titles (Intern physician) | 0(0.0) | 102(100.0) | - |
| Hospital rank | |  |  |  |  |
|  | Provincial hospital | 22(15.1) | 80(78.4) | - |
|  | Prefecture-level city hospital | 35(24.0) | 22(21.6) | - |
|  | Community, county and below hospital | 89(60.9) | 0(0.0) | - |
| Department | |  |  |  |
|  | Internal medicine | 4(2.7) | 29(28.4) | - |
|  | Surgery | 6(4.1) | 21(20.6) | - |
|  | Obstetrics and gynecology | 87(59.6) | 18(17.6) | - |
|  | Pediatric | 4(2.7) | 5(4.9) | - |
|  | Others* | 45(30.8) | 29(28.4) | - |

*: Others include otolaryngologist, ophthalmologist, radiologist, nurses, pathologists, pharmacists, radiologists, laboratory physicians, etc. A dash indicates that data are not available.
